# Supplementary material for: Quantitation of progenitor cell populations and growth factors after bone marrow aspirate concentration
Source: Springer Nature journal article supplement (doi:10.1186/s12967-019-1866-7), 2019-04-08

### Control

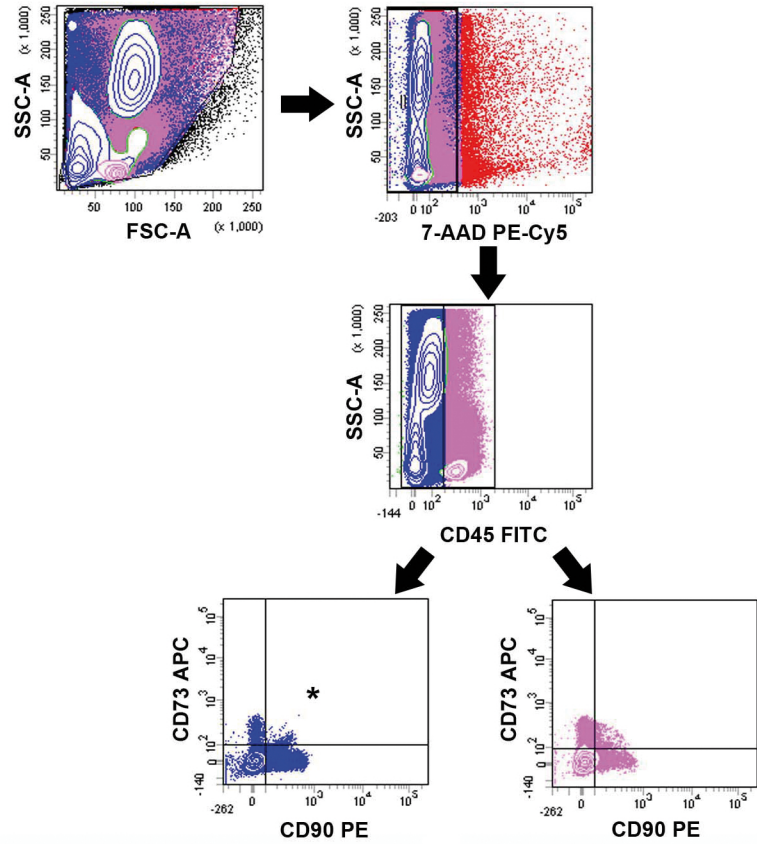

### Harvest

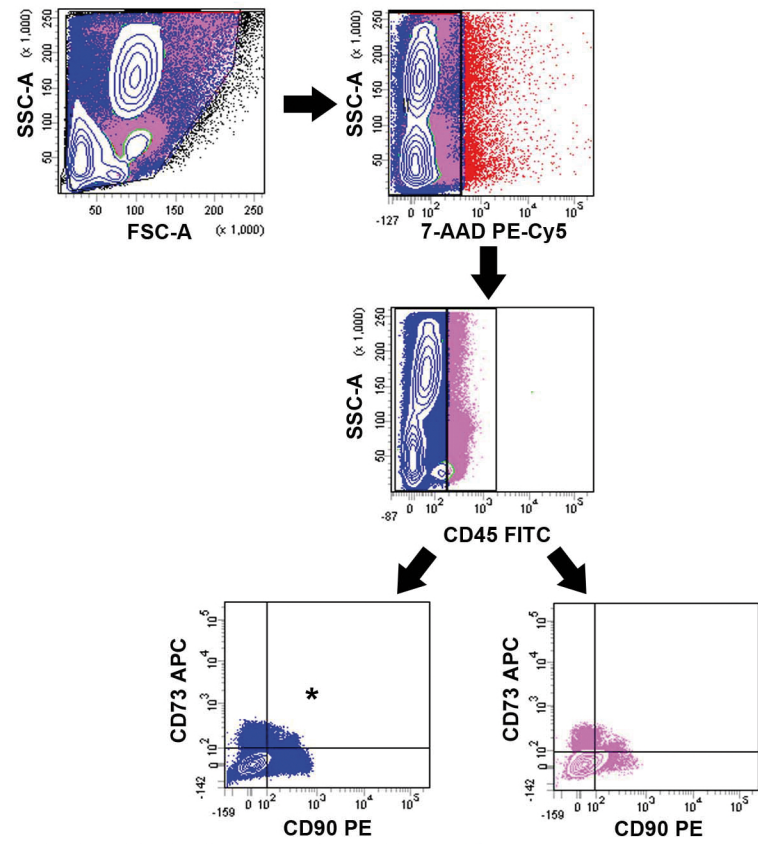

### Emcyte

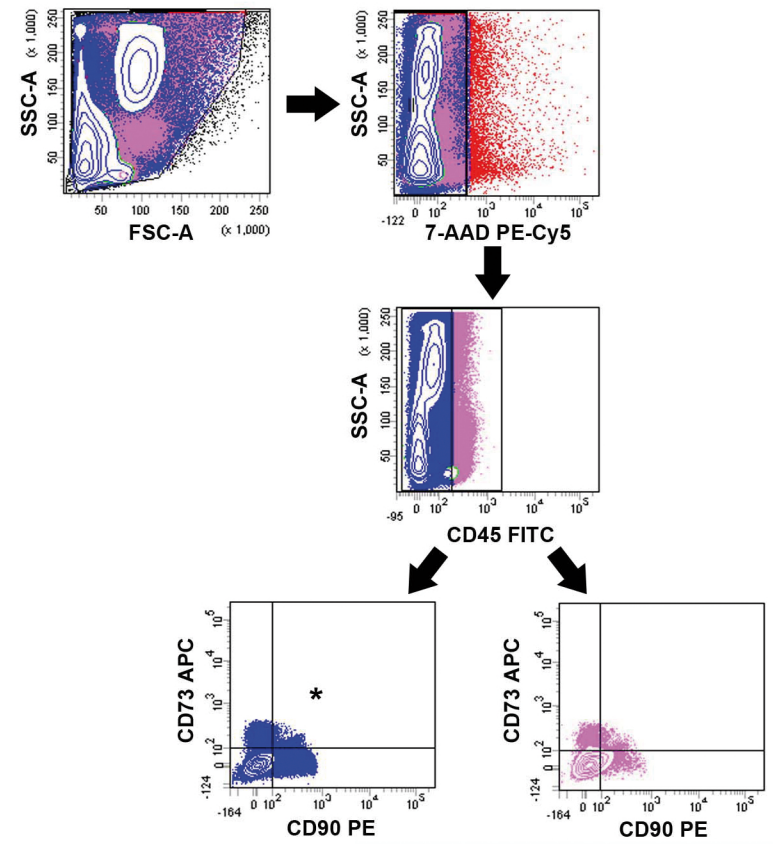

Supplement: MOESM1 [file 12967_2019_1866_MOESM1_ESM.pdf]
